# Supplementary material for: Decision aids that support decisions about prenatal testing for Down syndrome: an environmental scan
Source: Springer Nature journal article supplement (doi:10.1186/s12911-015-0199-6), 2015-09-24
Supplement: MOESM1 [file 9756390]

|                   |                                            |                    |                        |                            |     |     |     |     |                             |     |                             |                         |                         |                         |                       |     |     |                             |     |                             |     |     |    |
|-------------------|--------------------------------------------|--------------------|------------------------|----------------------------|-----|-----|-----|-----|-----------------------------|-----|-----------------------------|-------------------------|-------------------------|-------------------------|-----------------------|-----|-----|-----------------------------|-----|-----------------------------|-----|-----|----|
| Comprehensibility | Visual Representations                     | Graph              | yes                    |                            | yes |     | yes |     |                             | yes |                             |                         |                         |                         |                       |     |     | yes                         |     |                             | 5   |     |    |
|                   |                                            | Table              | yes                    | yes                        |     |     | yes | yes |                             |     | yes                         | yes                     | yes                     | yes                     | yes                   | yes | yes | yes                         | yes | yes                         |     | 14  |    |
|                   |                                            | Drawing            | yes                    |                            | yes |     |     |     |                             |     | yes                         | yes                     |                         |                         |                       |     |     | yes                         | yes | yes                         |     | 7   |    |
|                   |                                            | Picture            | yes                    |                            | yes | yes | yes |     |                             | yes | yes                         | yes                     |                         |                         | yes                   |     |     | yes                         | yes | yes                         | yes | 11  |    |
|                   |                                            | Organ.chart        |                        |                            |     |     |     |     |                             |     |                             |                         |                         |                         |                       |     | yes |                             |     |                             |     | 1   |    |
|                   |                                            | Algorithm          |                        |                            |     |     |     |     | yes                         |     |                             |                         |                         |                         |                       |     |     |                             |     |                             |     | 1   |    |
|                   |                                            | None               |                        |                            |     |     |     |     |                             |     |                             |                         |                         |                         |                       |     |     |                             |     |                             |     |     |    |
|                   | Others                                     |                    |                        |                            |     |     |     |     |                             |     | Prenatal screening calendar |                         |                         |                         |                       |     |     | reasoning of other patients |     |                             |     |     |    |
|                   | Educational components                     | Glossary           |                        |                            |     |     |     |     |                             |     |                             |                         |                         |                         |                       |     |     |                             |     |                             | yes | 1   |    |
|                   |                                            | Definitions        | yes                    |                            | yes | yes | yes |     | yes                         | yes | yes                         | yes                     | yes                     | yes                     | yes                   | yes | yes | yes                         | yes | yes                         | yes | yes | 17 |
|                   |                                            | Manual             |                        |                            |     |     |     |     |                             |     |                             |                         |                         |                         |                       |     |     |                             |     |                             |     |     |    |
|                   |                                            | Diagram            |                        |                            | yes |     |     |     |                             |     |                             |                         |                         |                         |                       |     |     |                             |     |                             |     |     | 1  |
|                   |                                            | Abrev.explanations | yes                    |                            |     | yes |     |     | yes                         | yes |                             | yes                     |                         |                         |                       |     |     | yes                         |     | yes                         | yes | yes | 8  |
|                   |                                            | Tutorials          |                        |                            |     |     |     |     |                             |     |                             |                         |                         |                         |                       |     |     |                             |     |                             |     |     |    |
| Links             |                                            | yes                | yes                    | yes                        | yes | yes | yes | yes | yes                         | yes |                             |                         |                         |                         |                       | yes | yes |                             | yes | yes                         | yes | 14  |    |
| Flowchart         |                                            |                    | yes                    |                            |     |     |     |     |                             |     |                             |                         |                         |                         |                       |     |     |                             |     |                             | 1   |     |    |
| None              |                                            |                    |                        |                            |     |     |     |     |                             |     |                             |                         |                         |                         |                       |     |     |                             |     |                             |     |     |    |
| Others            | Summary of tests, table of contents, scale |                    | 14 videos, board index | parents' stories (witness) |     |     |     |     | Sheet for writing questions |     |                             | women's stories, scales | women's stories, scales | women's stories, scales | women stories, scales |     |     |                             |     | Sheet for writing questions |     |     |    |

M.C.R.I.—Murdock Children's Research Institut  
web= internet site  
pap= paper  
pcr= polymerase chain reaction  
cub= combined ultrasound and biochemica  
d=disease  
card dig ren abn=
